# Supplementary material for: Complex Toxin Profile of French Mediterranean Ostreopsis cf. ovata Strains, Seafood Accumulation and Ovatoxins Prepurification
Source: Mar Drugs. 2014 May 13;12(5):2851–76. doi: 10.3390/md12052851 (PMC4052321; doi:10.3390/md12052851)
Supplement: Supplementary File 1 — PDF-Document (PDF, 48 KB) [file marinedrugs-12-02851-s001.pdf]

## Supplementary Information

**Table S1.** Percentage of toxins according to the depth.

| Depth<br>(m) | p-PLTX<br>(%) | OVTX-a<br>(%) | OVTX-b<br>(%) | OVTX-c<br>(%) | OVTX-d<br>(%) | OVTX-e<br>(%) | OVTX-f<br>(%) |
|--------------|---------------|---------------|---------------|---------------|---------------|---------------|---------------|
| 0,5          | 13            | 48            | 13            | 8             | 5             | 12            | 0             |
| 1            | 17            | 37            | 17            | 11            | 2             | 16            | 0             |
| 3            | 15            | 38            | 14            | 12            | 4             | 16            | 0             |

**Table S2.** Summary of total PLTX-group toxins concentrations found on different contaminated marine organisms. Sea urchins diameters without spines and sea-brems total length were indicated in brackets.

| Marine Organisms Number of<br>Organisms Sampled | Sea Urchins (Paracentrotus Lividus) <i>n</i> = 10<br>(Diameter without Spines from 4 and 5 cm) | Sea Brems (Sarpa Salpa) <i>n</i> = 21<br>(Total Length from 7.1 and 9.8 cm) |
|-------------------------------------------------|------------------------------------------------------------------------------------------------|-----------------------------------------------------------------------------|
| Number of Organisms<br>Contaminated             | 9                                                                                              | 6                                                                           |
|                                                 | 231                                                                                            | 54                                                                          |
|                                                 | 213                                                                                            | 85                                                                          |
|                                                 | 309                                                                                            | 33                                                                          |
| Total PLTX-eq in whole Flesh of                 | 205                                                                                            | 152                                                                         |
| Contaminated Organism (µg/kg)                   | 103                                                                                            | 19                                                                          |
| (Size of Organisms cm)                          | 191                                                                                            | 54                                                                          |
|                                                 | 423                                                                                            |                                                                             |
|                                                 | 215                                                                                            |                                                                             |
|                                                 | 121                                                                                            |                                                                             |

**Figure S1.** Nonlinear regression of *Ostreopsis cf. ovata* in function of depth.

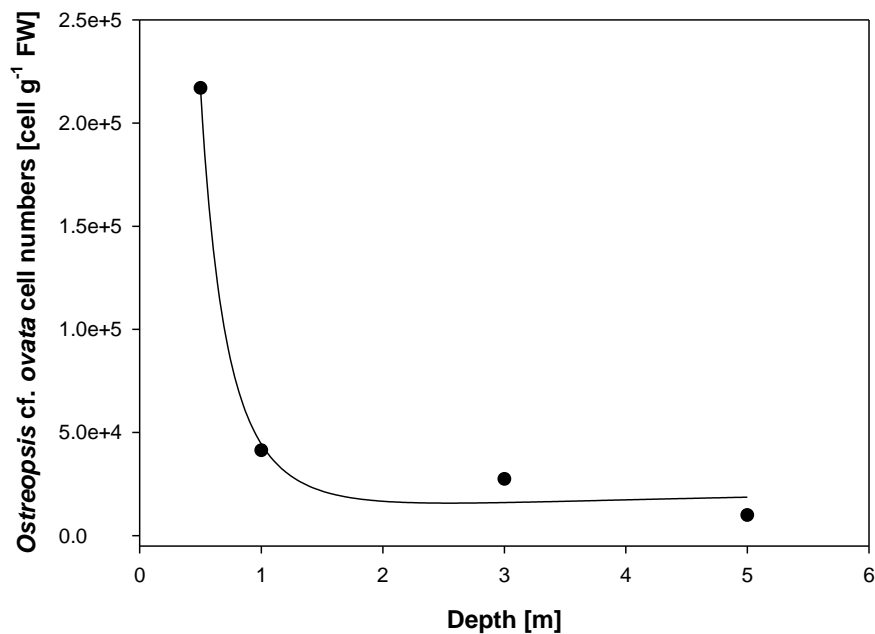

**Figure S1. Cont.**

## Nonlinear Regression

Data Source: Data 1 in Notebook1

Equation: Polynomial, Inverse Second Order

 $f = y_0 + (a/x) + (b/x^2)$ 

| R      | Rsqr   | Adj Rsqr | Standard Error of Estimate |  |
|--------|--------|----------|----------------------------|--|
| 0.9961 | 0.9923 | 0.9768   | 14672.6894                 |  |

|    | Coefficient | Std. Error | t       | P      |
|----|-------------|------------|---------|--------|
| y0 | 27751.8472  | 19006.5881 | 1.4601  | 0.3823 |
| a  | -60949.3960 | 50731.9512 | -1.2014 | 0.4419 |
| b  | 77646.7708  | 22434.7535 | 3.4610  | 0.1791 |

## Analysis of Variance:

|            | DF | SS               | MS             |                  |
|------------|----|------------------|----------------|------------------|
| Regression | 3  | 49428568586.8602 |                | 16476189528.9534 |
| Residual   | 1  | 215287813.1398   | 215287813.1398 |                  |
| Total      | 4  | 49643856400.0000 |                | 12410964100.0000 |

## Corrected for the mean of the observations:

|            | DF | SS               | MS             | F                | P |         |        |
|------------|----|------------------|----------------|------------------|---|---------|--------|
| Regression | 2  | 27580772486.8602 |                | 13790386243.4301 |   | 64.0556 | 0.0880 |
| Residual   | 1  | 215287813.1398   | 215287813.1398 |                  |   |         |        |
| Total      | 3  | 27796060300.0000 |                | 9265353433.3333  |   |         |        |

## Statistical Tests:

|                               |        |              |
|-------------------------------|--------|--------------|
| Normality Test (Shapiro-Wilk) | Passed | (P = 0.8162) |
|-------------------------------|--------|--------------|

W Statistic= 0.9659

Significance Level = 0.0500
